# Supplementary material for: Primary cilia regulate Meibomian glands development and dimensions without impairing lipid composition of the meibum
Source: bioRxiv or medRxiv preprint supplement (doi:10.1101/2022.05.16.492188), 2022-05-17
Supplement: Supplementary file [file media-1.pdf]

A

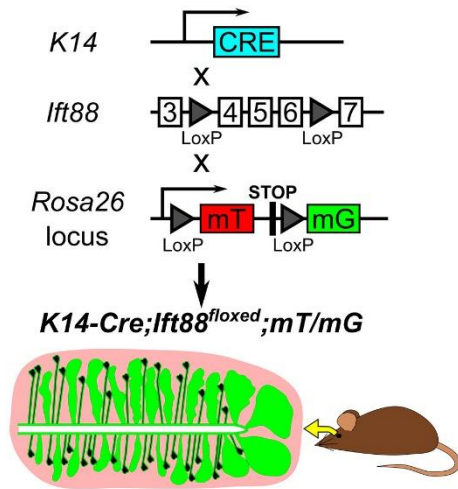

B

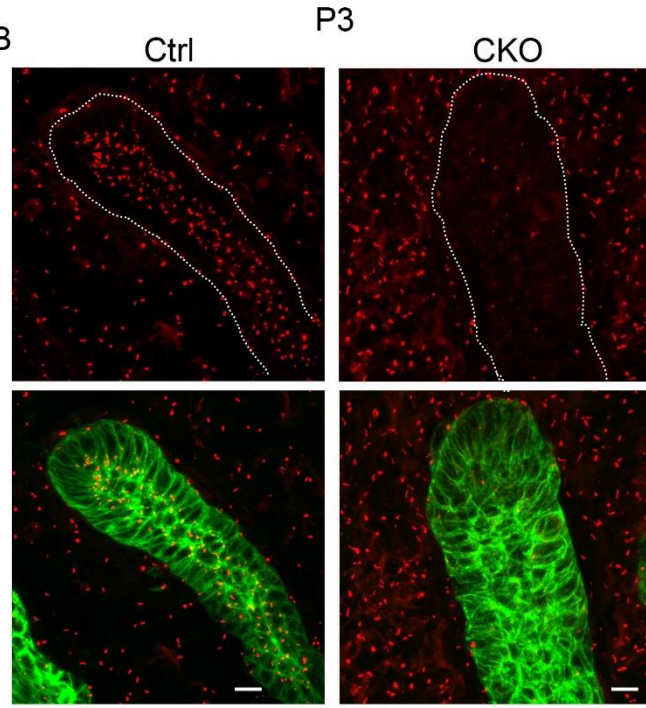

ARL13B mGFP

Figure S1

Bar= 10 $\mu$ m

A

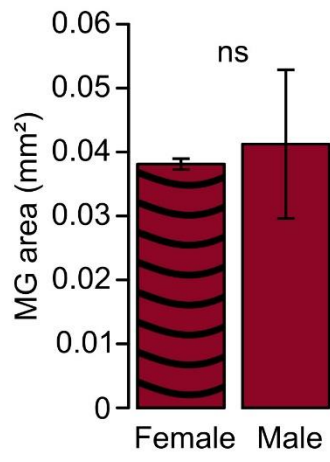

B

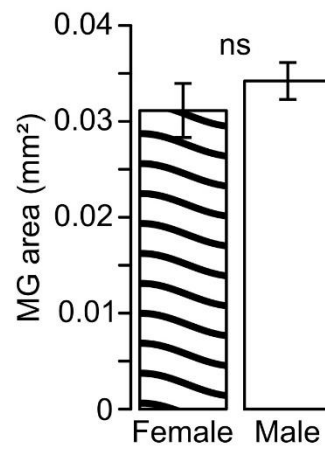

Figure S2

A

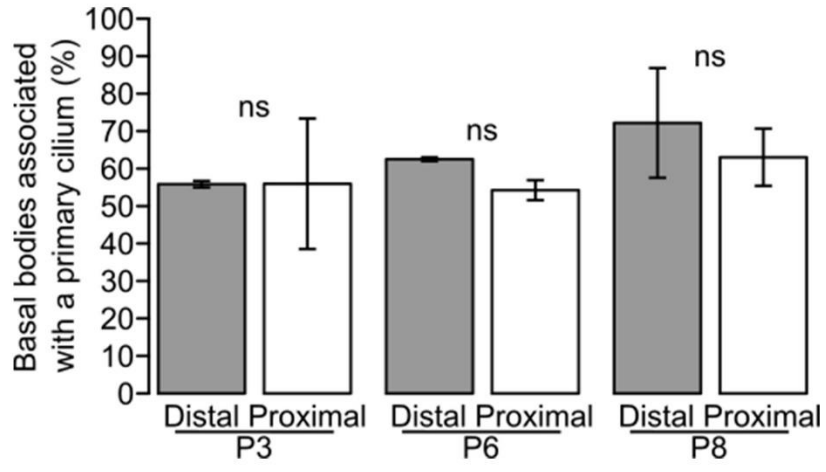

Figure S3
